# Supplementary material for: Comparative Effects of Prolonged and Intermittent Stimulation of the Glucagon-Like Peptide 1 Receptor on Gastric Emptying and Glycemia
Source: PubMed Central journal article supplement — Diabetes. 2014 Jan 16;63(2):785–90. doi: 10.2337/db13-0893 (PMC3900552; doi:10.2337/db13-0893), 2014-01-16

SUPPLEMENTARY DATA

**Supplementary Figure 1.** The effect of different GLP-1 regimens on postprandial glycemia plotted over time.

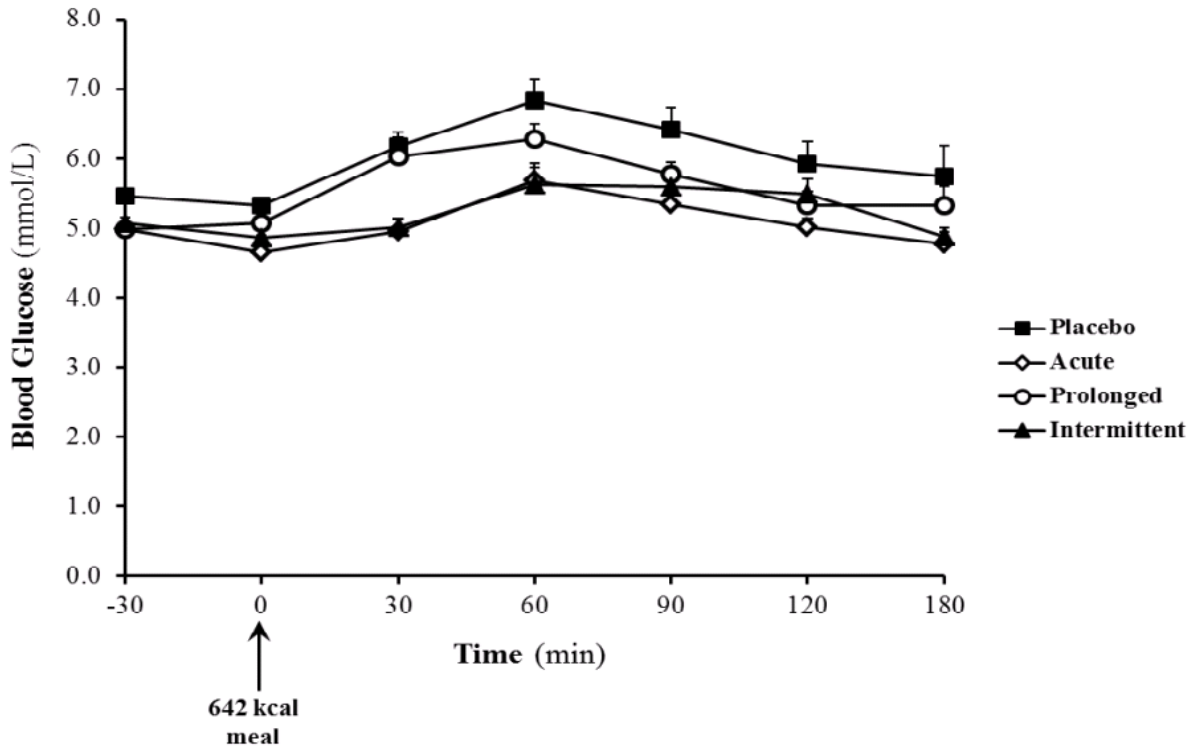

**Supplementary Figure 2.** The effect of different GLP-1 regimens on postprandial insulinemia plotted over time.

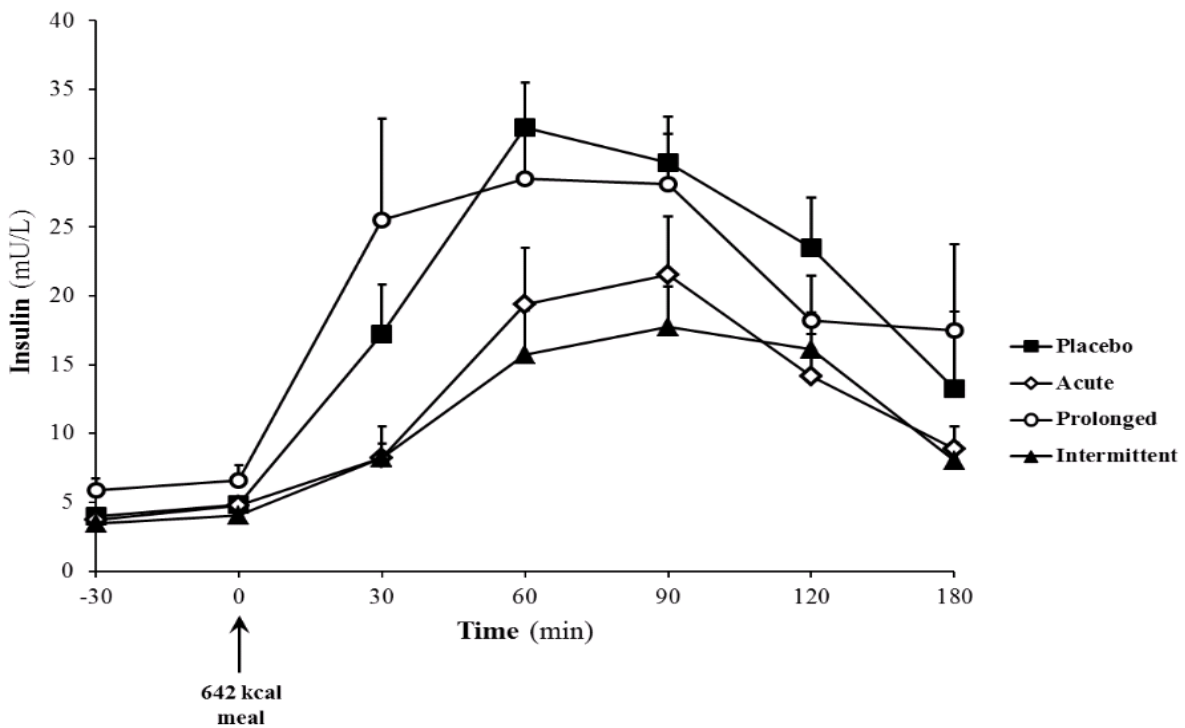

SUPPLEMENTARY DATA

**Supplementary Figure 3.** The effect of different GLP-1 regimens on postprandial insulin/glucose ratios. Postprandial insulin/glucose (I/G) ratio was reduced during acute GLP-1 when compared to placebo (P=0.035), and intermittent when compared to prolonged (P=0.002).

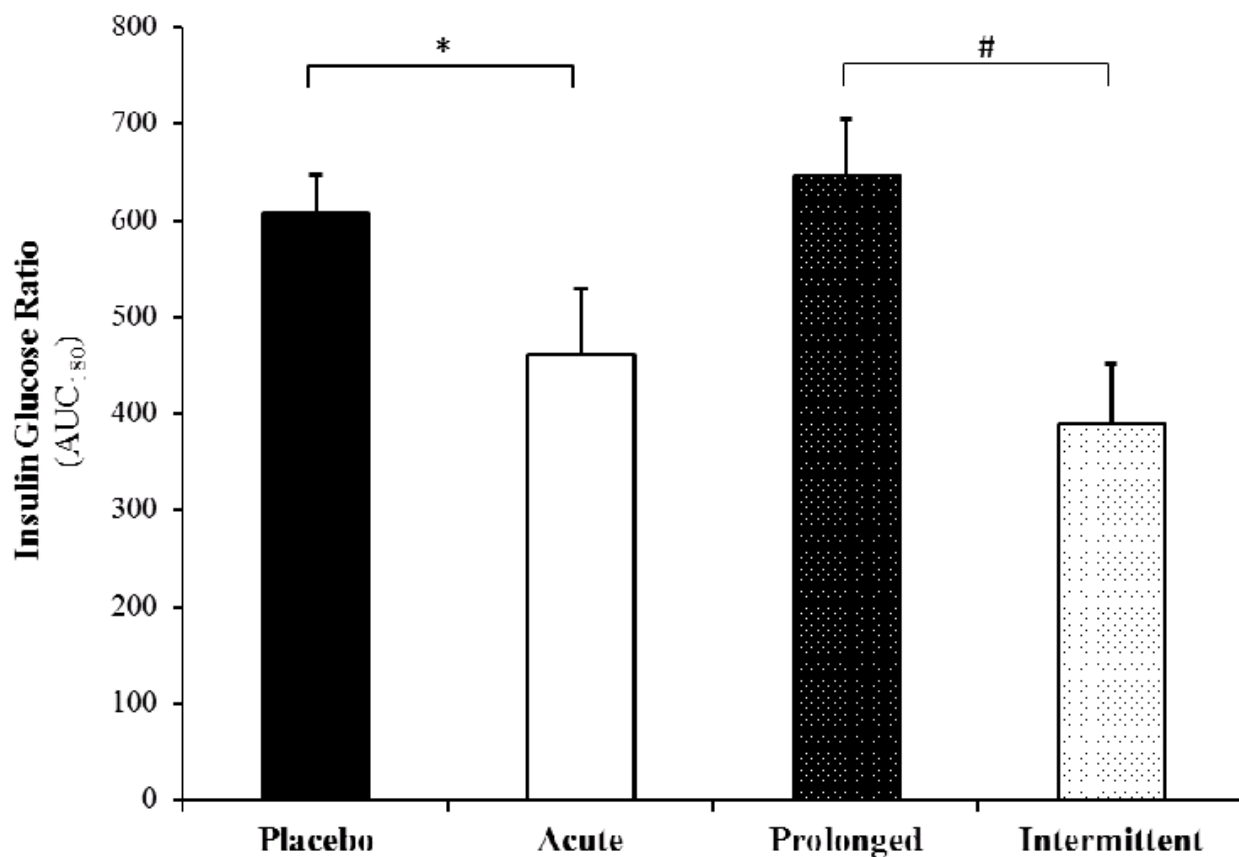

Supplement: supp_db13-0893_DB130893SupplementaryData.pdf [file supp_db13-0893_DB130893SupplementaryData.pdf]
